# Supplementary material for: Loss of Fis1 impairs proteostasis during skeletal muscle aging in Drosophila
Source: PubMed Central journal article supplement (PMC8208795; doi:10.1111/acel.13379), 2021-06-01

# Supplemental Information

## Figure S1

### S1A

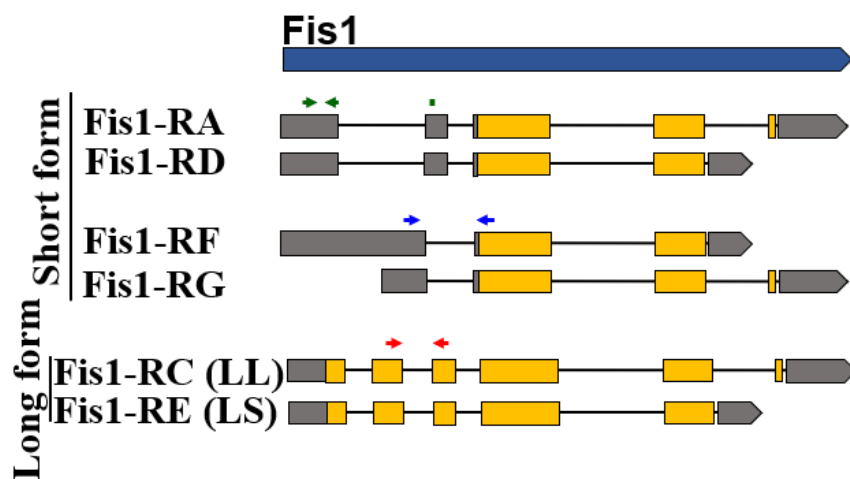

### S1B

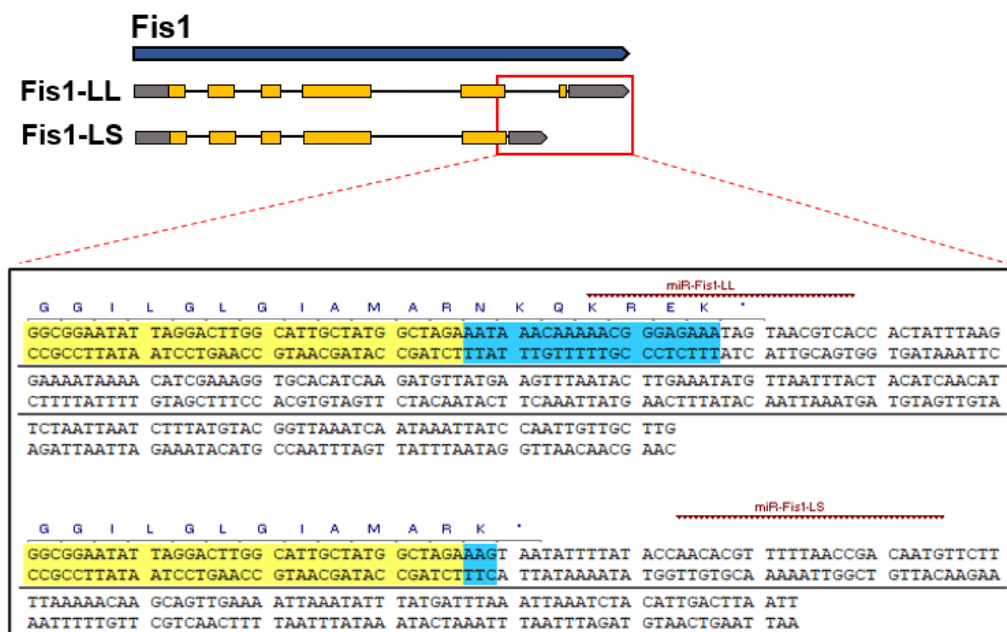

Figure S1

S1C

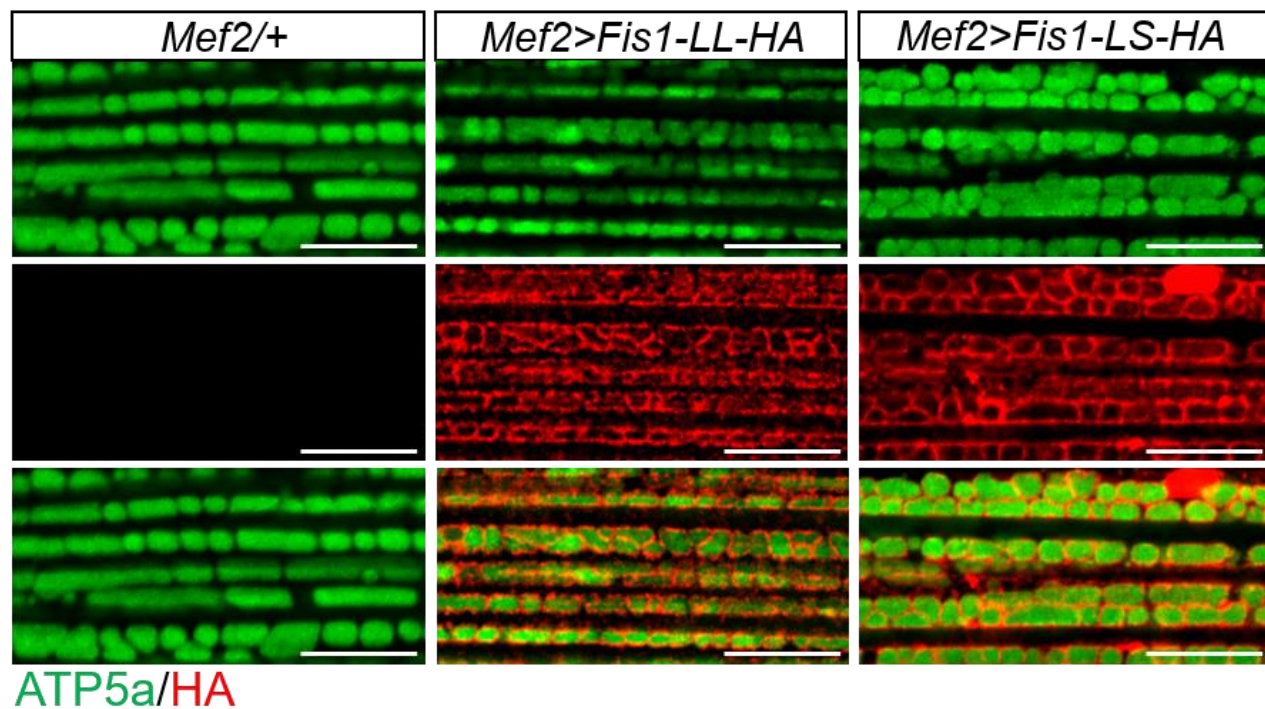

S1D

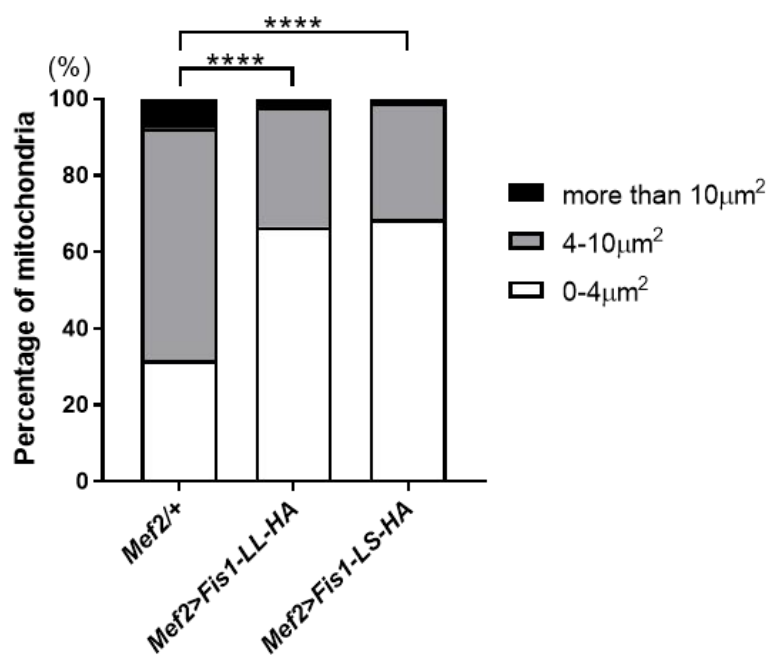

**Figure S1**

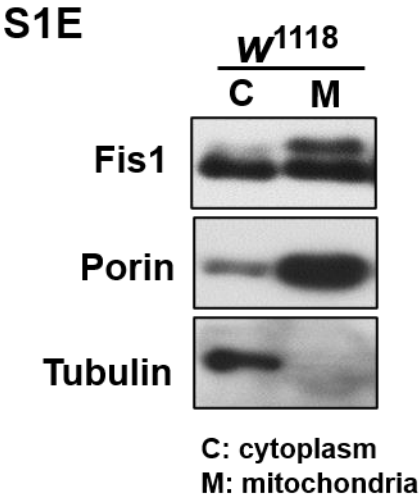

Figure S2

S2A

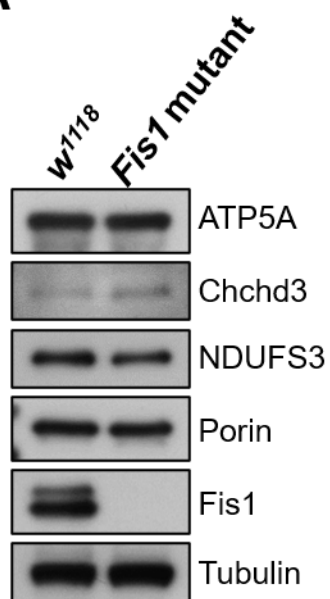

S2B

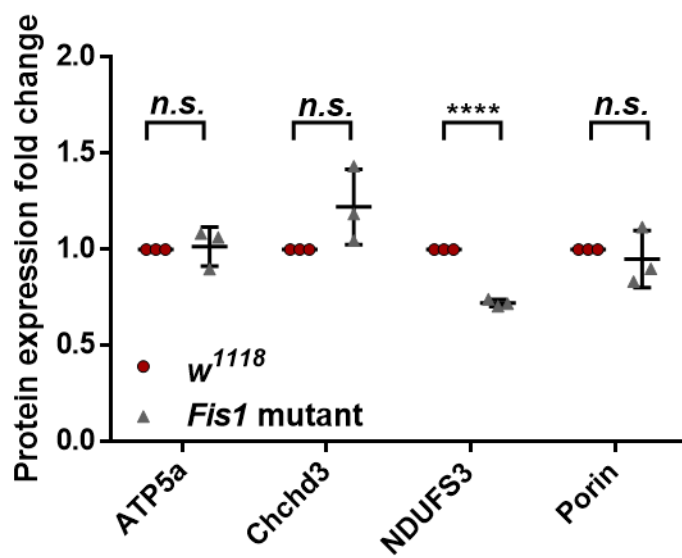

Figure S3

S3

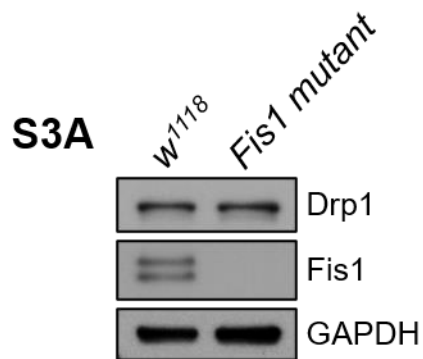

**S3B**

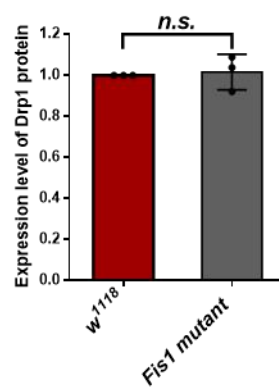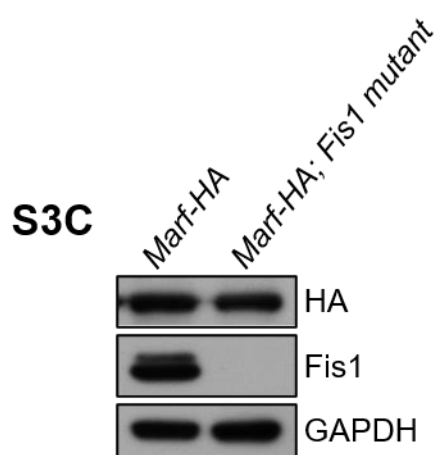

**S3D**

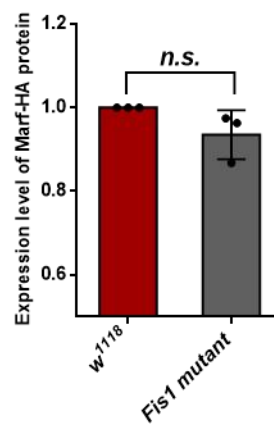

Figure S4

S4 Group A :

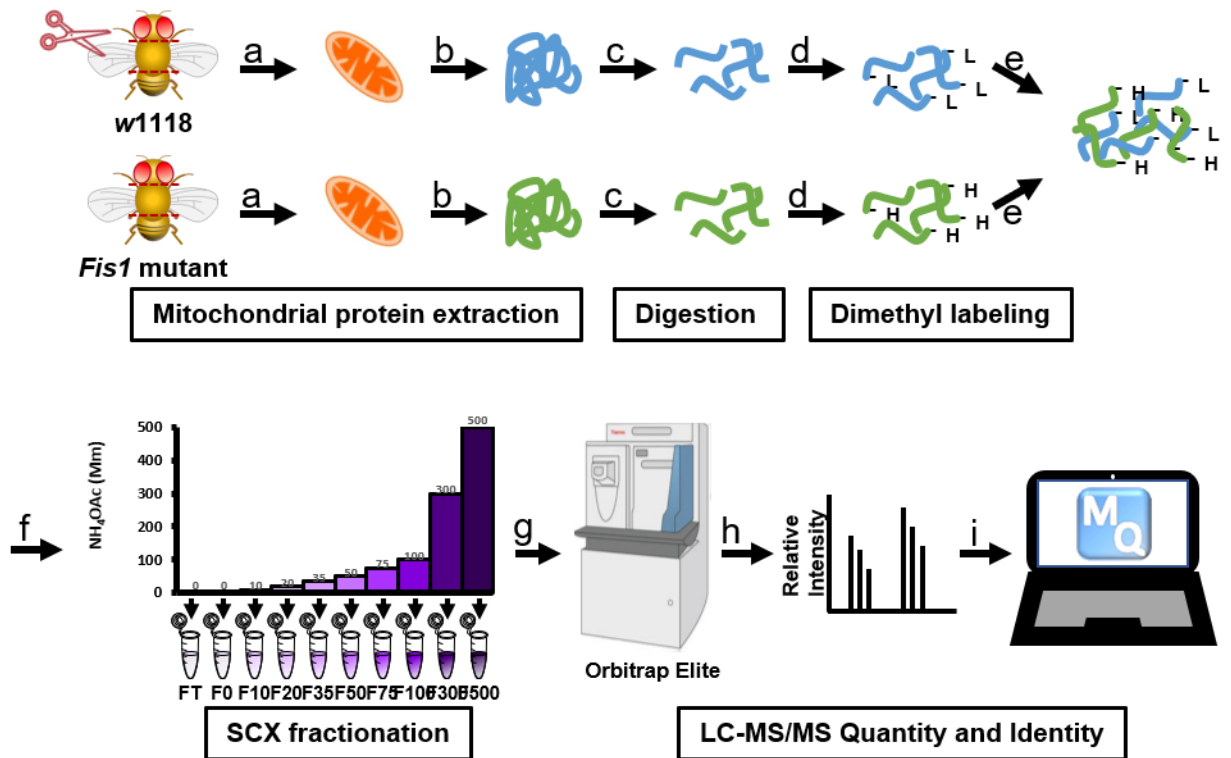

Figure S5

S5

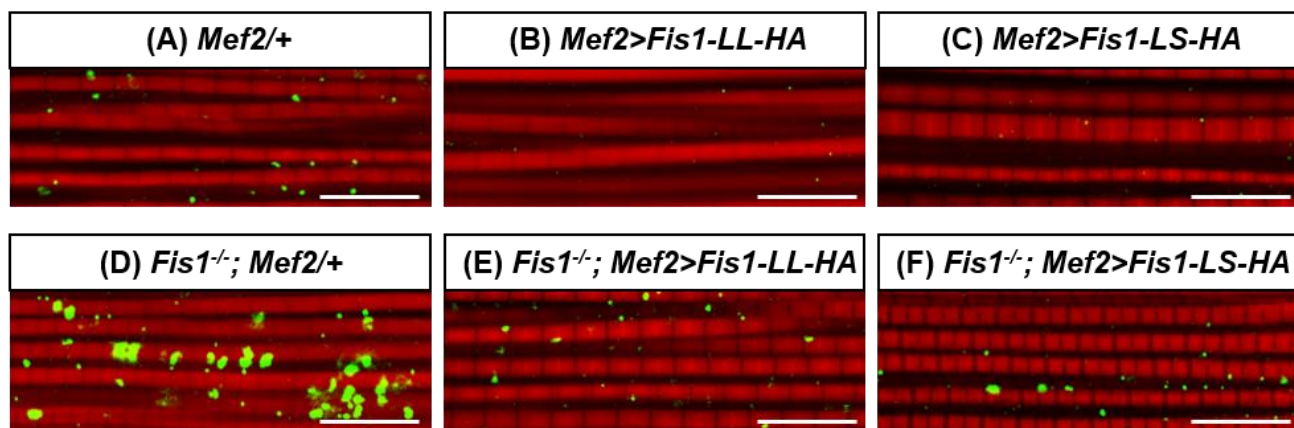

4-HNE/Phalloidin

G

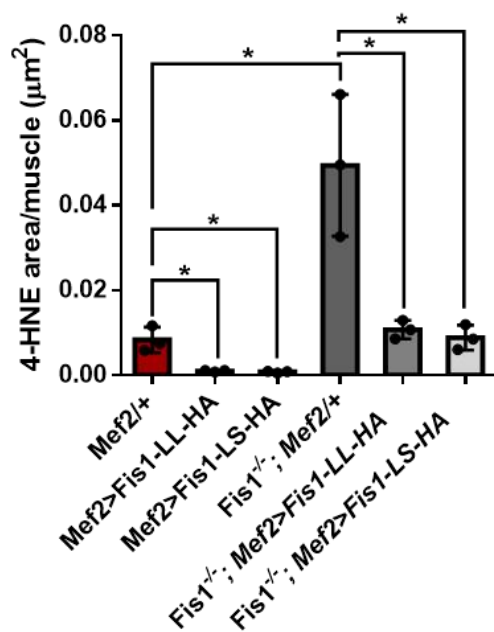

Figure S6

S6

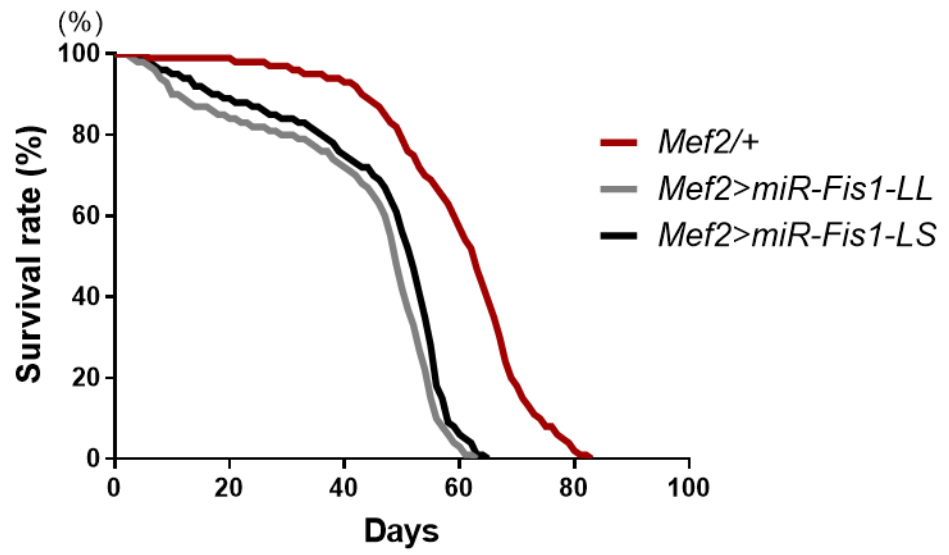



Figure S7

S7

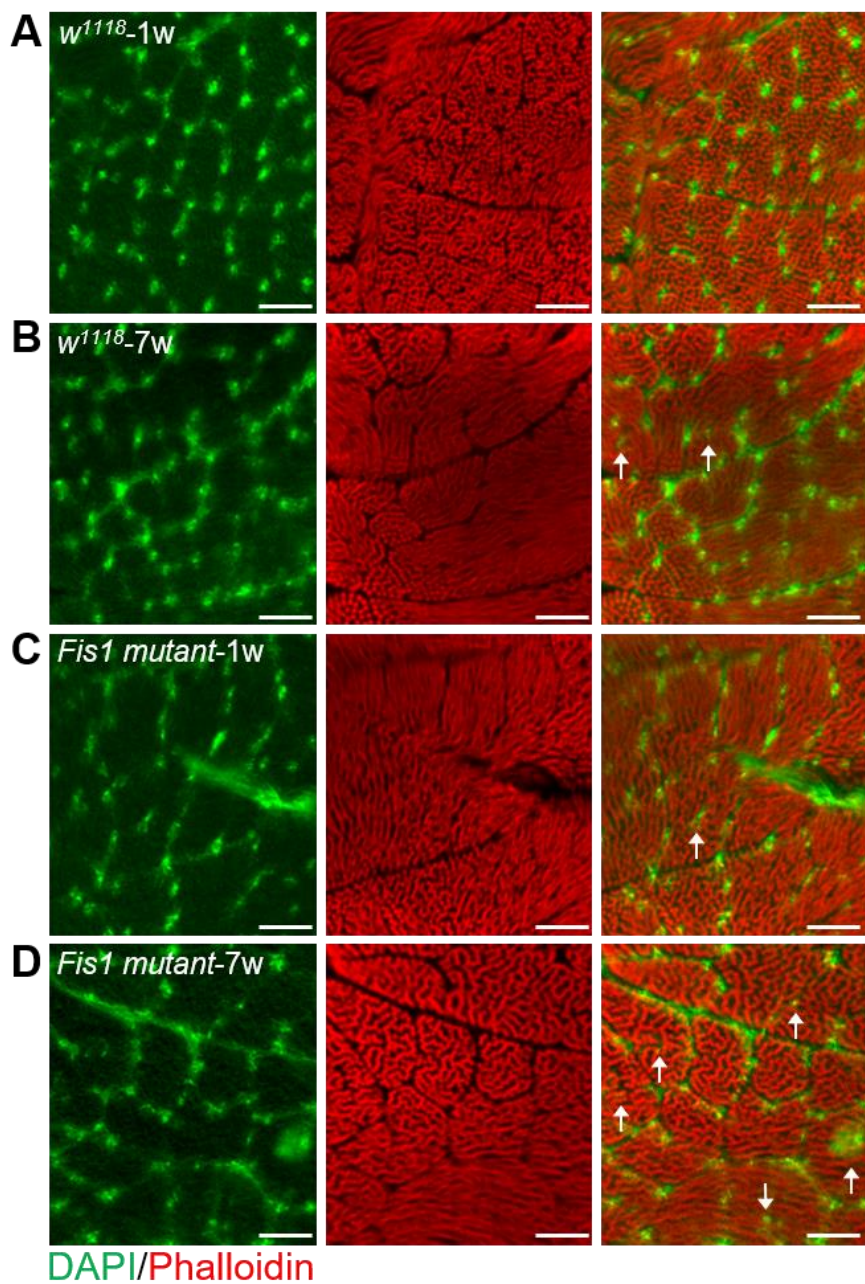

**E**

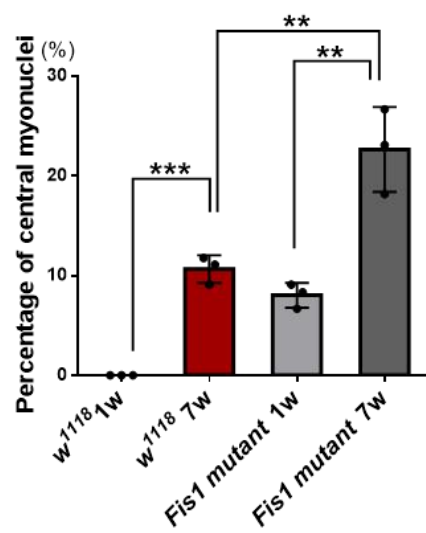

Supplement: ACEL-20-e13379-s001.pdf [file ACEL-20-e13379-s001.pdf]
